# Supplementary material
Source: publisher figshare collection journal article supplement (https://geolsoc.figshare.com/ndownloader/files/22319589)
Supplement: Supplementary file 1 [file 22319589]

## Sheet: Tabelle1
		ICP-MS (ALS Laboratories, Galway, Ireland)
Sample	Type	La (ppm)	Ce (ppm)	Pr (ppm)	Nd (ppm)	Sm (ppm)	Eu (ppm)	Gd (ppm)	Tb (ppm)	Dy (ppm)	Ho (ppm)	Er (ppm)	Tm (ppm)	Yb (ppm)	Lu (ppm)	Hf (ppm)	U (ppm)	Cs (ppm)	Ta (ppm)
Fi 13-13	Bittesch Gneiss	18.2	34.3	3.7	11.6	2.35	0.57	2.27	0.44	2.73	0.61	1.59	0.19	1.37	0.21	2.2	1.32	0.82	0.7
MM 146-15	Bittesch Gneiss	16.9	33	3.67	11.7	1.82	0.75	1.31	0.17	0.97	0.2	0.56	0.07	0.62	0.09	3.6	0.66	0.57	0.3
Fi 2-13	Bittesch Gneiss	22	42.1	4.61	15.2	2.73	0.53	2.16	0.33	1.87	0.41	1.06	0.12	0.72	0.11	2	1.35	1.55	0.4
